# Supplementary material for: Investigating Circular RNAs Using qRT-PCR; Roundup of Optimization and Processing Steps
Source: MDPI journal article supplement (doi:10.3390/ijms24065721), 2023-03-16
Supplement: s1 [file s1]

## Supplementary Figures and Tables

### 1. Total RNA extraction, DNase treatment and quantification

• Phenol-Chlorophorm extraction

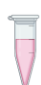

• Column-based kit extraction

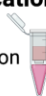

• DNase treatment is mandatory for preventing unspecific amplification down the line

### 2. RNase R treatment

• **Minimum starting RNA concentration:**

1 µg of total RNA

• **Enzyme input:**

10 units of RNase R/reaction + Provided buffer

• **Incubation:**

1 hr at 37°C

! Always include a mock treated control (no added enzyme) for each investigated sample, in order to assess the efficiency of the RNase R treatment

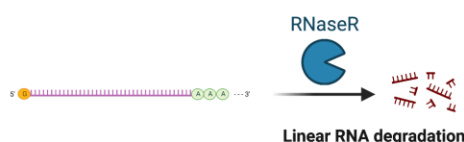

### 3. RNA cleanup

• Column kit based purification of circRNA enriched fraction is required for the removal of degraded RNA fragments and other contaminants from the RNase R treatment

**Recommended kit:** RNAeasy cleanup kit (Qiagen)

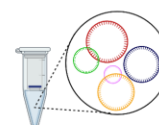

### 4. RNA re-quantification and Bioanalyzer quality control (optional)

• Fluorimetric quantification is recommended due to higher accuracy (Qubit)

• Depending on input, a significant decrease in RNA concentration following the multiple processing steps is expected

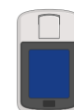

### 5. cDNA synthesis

• **Starting concentrations:** 30 < ng

! Random hexamers should be used, and not OligoDTs

• **Recommended kits:**

AzuraFlex™ cDNA Kit

Applied Biosystems™ High-Capacity cDNA Kit

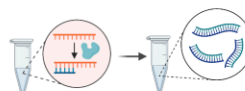

### 6. Primer validation

• Previously designed primers should be validated via PCR and agarose gel electrophoresis, and the DNA purified from bands corresponding to the expected size of the amplicon can be sequenced to validate the expected amplified region

• A single peak from melting temperature resulted from the qPCR melting curve analysis can also confirm the specificity of the primers

! In some cases, a temperature gradient is required in order to confirm the correct annealing temperature of your

### 7. qPCR and circRNA enrichment analysis

• A standard curve of 5 cDNA dilutions is recommended to determine the required amount for an efficient amplification

• The expression level of the parental gene (or a linear mRNA) should be investigated to determine both RNase R treatment efficiency and calculate circRNA enrichment

• Circular RNA enrichment following RNase R treatment can be quantified as percentages, as by the formula indicated by Panda & Gorospe:

| Target RNA | Average CT Values |         | % of RNA in Control                                  | % of RNA in RNase R treated sample                   |
|------------|-------------------|---------|------------------------------------------------------|------------------------------------------------------|
|            | Control           | RNase R | $2^{\Delta CT \text{ (Control-Control)}} \times 100$ | $2^{\Delta CT \text{ (Control-RNase R)}} \times 100$ |
| X mRNA     | 25,98             | 29,06   | 100                                                  | 11.81                                                |
| X circRNA  | 29,47             | 28,93   | 100                                                  | 145.44                                               |

! Percentages can vary based on the transcript's specific susceptibility to RNase R and circRNA enrichment levels

! Linear RNAs should have a more significant decrease in CT values in comparison to the investigated circRNAs

**Supplemental Figure 1.** Detailed step-by-step protocol for the techniques and steps required for the analysis of circRNA using qPCR

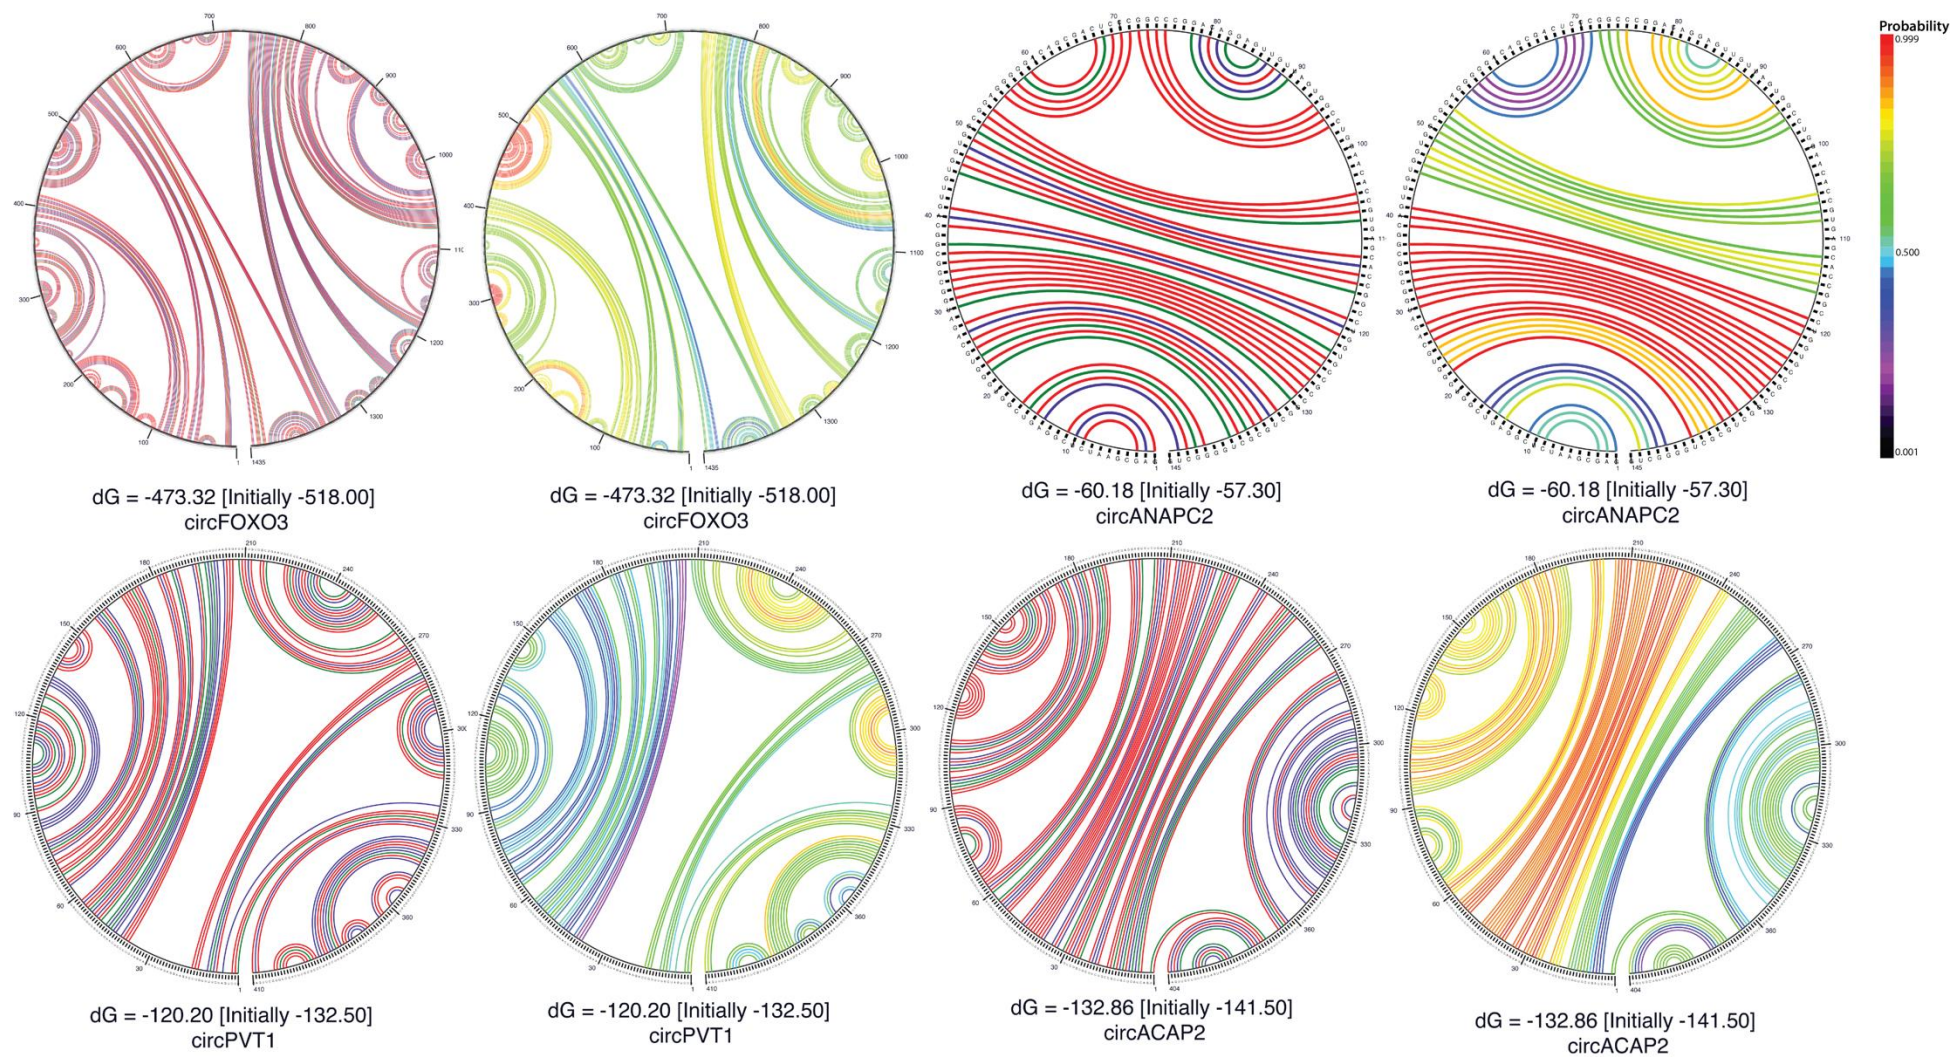

**Supplemental Figure 2.** Secondary structure formation prediction based on nucleotide complementarity (left, for each circRNA), the thermodynamic probability of their interaction (right, legend for interaction probability on far right) and calculated standard free energies ( $dG$ )

**Supplemental Table 1.** Nucleotide and GC% composition of the circRNAs.

| Transcript | Total Bases | A   | C   | G   | U   | GC%  |
|------------|-------------|-----|-----|-----|-----|------|
| circFOXO3  | 1435        | 333 | 441 | 369 | 292 | 56,4 |
| circPVT1   | 410         | 90  | 92  | 116 | 112 | 50,7 |
| circANAPC2 | 145         | 20  | 37  | 65  | 23  | 70,3 |
| circACAP2  | 410         | 82  | 104 | 125 | 93  | 56,7 |

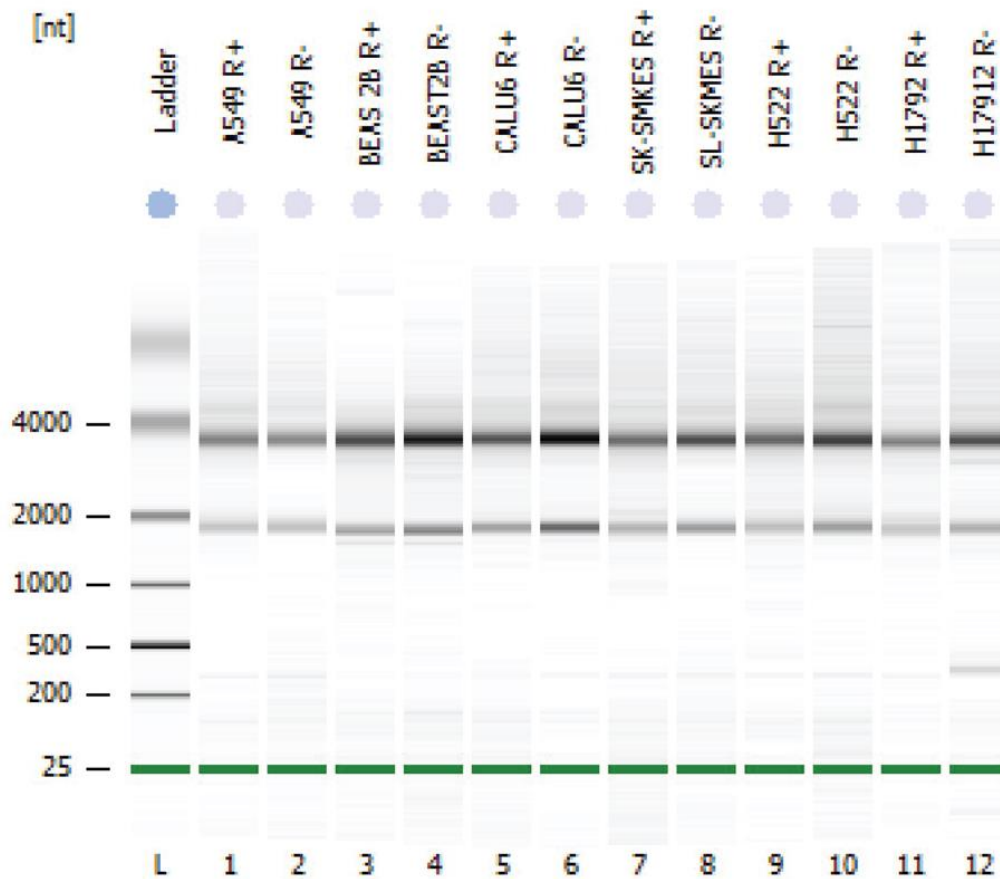

**Supplemental Figure 3.** Bioanalyzer electrophoresis gel summary of RNase R treated and untreated samples after cleanup

**Supplemental Table 2.** Primers utilized in the study

| Circular RNA | Accession | Amplicon (bp) | Regions  | Forward                      | Reverse                        |
|--------------|-----------|---------------|----------|------------------------------|--------------------------------|
| circFOXO3    | NM_001455 | 183           | Exon 2   | GTGGGGAACCTCACTG<br>GTGCTAAG | GGGTTGATGATCCACCAAGAGC<br>TCTT |
| circPVT1     | NR_003367 | 118           | Exon 2   | CTCTTCCTGGTGAAGC<br>ATCTG    | CTGACAGGCACAGCCATCT            |
| circANAPC2   | NM_013366 | 162           | Exon 3-1 | AGAGGATGGAGGACC<br>GTTG      | TCCAGGCCACTAACAACCTCC          |
| circACAP2    | NM_012287 | 229           | Exon 3-1 | TAATGATGCTGTCGTTG<br>AGC     | CCTTCAGACACTCCTCGAAA           |
| FOXO3        | NM_001455 |               |          | GCAAGAGCTCTTGGTG<br>GA       | TGGGGCTGCCAGGCCACTTGGAG<br>GAG |
| PVT1         | NR_003367 |               |          | TGGAATGTAAGACCCC<br>GACTCT   | GATGGCTGTATGTGCCAAGGT          |
| ANAPC2       | NM_013366 |               |          | TATGTTGCGCGGAGTC<br>TTGT     | CCAGCACTGTTGCTTGTCTAC          |
| ACAP2        | NM_012287 |               |          | TCCAGGAGCCGCACTT<br>CTA      | CTCCGGGATGTGGATCTTCA           |

|       |               |                            |                        |
|-------|---------------|----------------------------|------------------------|
| GAPDH | NM_00204<br>6 | GTCTCCTCTGACTTCAA<br>CAGCG | ACCACCCTGTTGCTGTAGCCAA |
|-------|---------------|----------------------------|------------------------|

**Supplemental Table 3.** Sample RNA concentrations following processing steps

| Sample Characteristics |         |                                | Concentration after RNase Treatment and Cleanup |                  |              |      |            |
|------------------------|---------|--------------------------------|-------------------------------------------------|------------------|--------------|------|------------|
| Nr                     | Name    | Starting Concentration (ng/uL) | RNase R                                         | Nanodrop (ng/uL) | Qbit (ng/uL) | RIN  | cDNA Input |
| 1                      | A549    | 332                            | +                                               | 30.2             | 9,2          | 9.70 | 100        |
| 2                      | A549    |                                | -                                               | 10,2             | 3,4          | 9.4  |            |
| 3                      | BEAS2B  | 220                            | +                                               | 30,4             | 11,26        | 9.2  |            |
| 4                      | BEAS2B  |                                | -                                               | 13.2             | 4,4          | 9.9  |            |
| 5                      | CALU6   | 566                            | +                                               | 30.6             | 3,76         | 9.9  |            |
| 6                      | CALU6   |                                | -                                               | 10.3             | 2,94         | 10   |            |
| 7                      | SK-MES1 | 272                            | +                                               | 29.1             | 3,4          | 9.80 |            |
| 8                      | SK-MES1 |                                | -                                               | 9,6              | 4,94         | 10   |            |
| 9                      | H522    | 174                            | +                                               | 27               | 7,96         | 8.8  |            |
| 10                     | H522    |                                | -                                               | 11,2             | 2,64         | 10   |            |
| 11                     | H1792   | 240                            | +                                               | 33.3             | 10,2         | 9.40 |            |
| 12                     | H1792   |                                | -                                               | 10,3             | 1,4          | 8.40 |            |

**Supplemental Table 4.** Exemplified method of calculating post-RNase R enrichment of circRNAs and linear transcripts based on averaged CT values derived from the qPCR analysis of A549 RNase R treated and untreated control RNA samples

|        |            | Average CT values  |          | % of RNA in Control                        | % of RNA in RNase R                        |
|--------|------------|--------------------|----------|--------------------------------------------|--------------------------------------------|
| Sample | Target RNA | Control (RNase R-) | RNase R+ | 2 <sup>Δ</sup> ΔCT (Control-Control) * 100 | 2 <sup>Δ</sup> ΔCT (Control-RNase R) * 100 |
| A549   | FOXO3      | 28,367             | 33,186   | 100%                                       | 3,54%                                      |
|        | circFOXO3  | 29,133             | 29,050   |                                            | 105,88%                                    |
|        | PVT1       | 26,984             | 33,125   |                                            | 1,42%                                      |
|        | circPVT1   | 33,033             | 31,268   |                                            | 340,06%                                    |
|        | ANAPC2     | 26,562             | 31,968   |                                            | 2,36%                                      |
|        | circANAPC2 | 28,735             | 28,490   |                                            | 118,53%                                    |
|        | ACAP2      | 29,995             | 30,820   |                                            | 56,42%                                     |
|        | circACAP2  | 31,562             | 31,831   |                                            | 83,00%                                     |



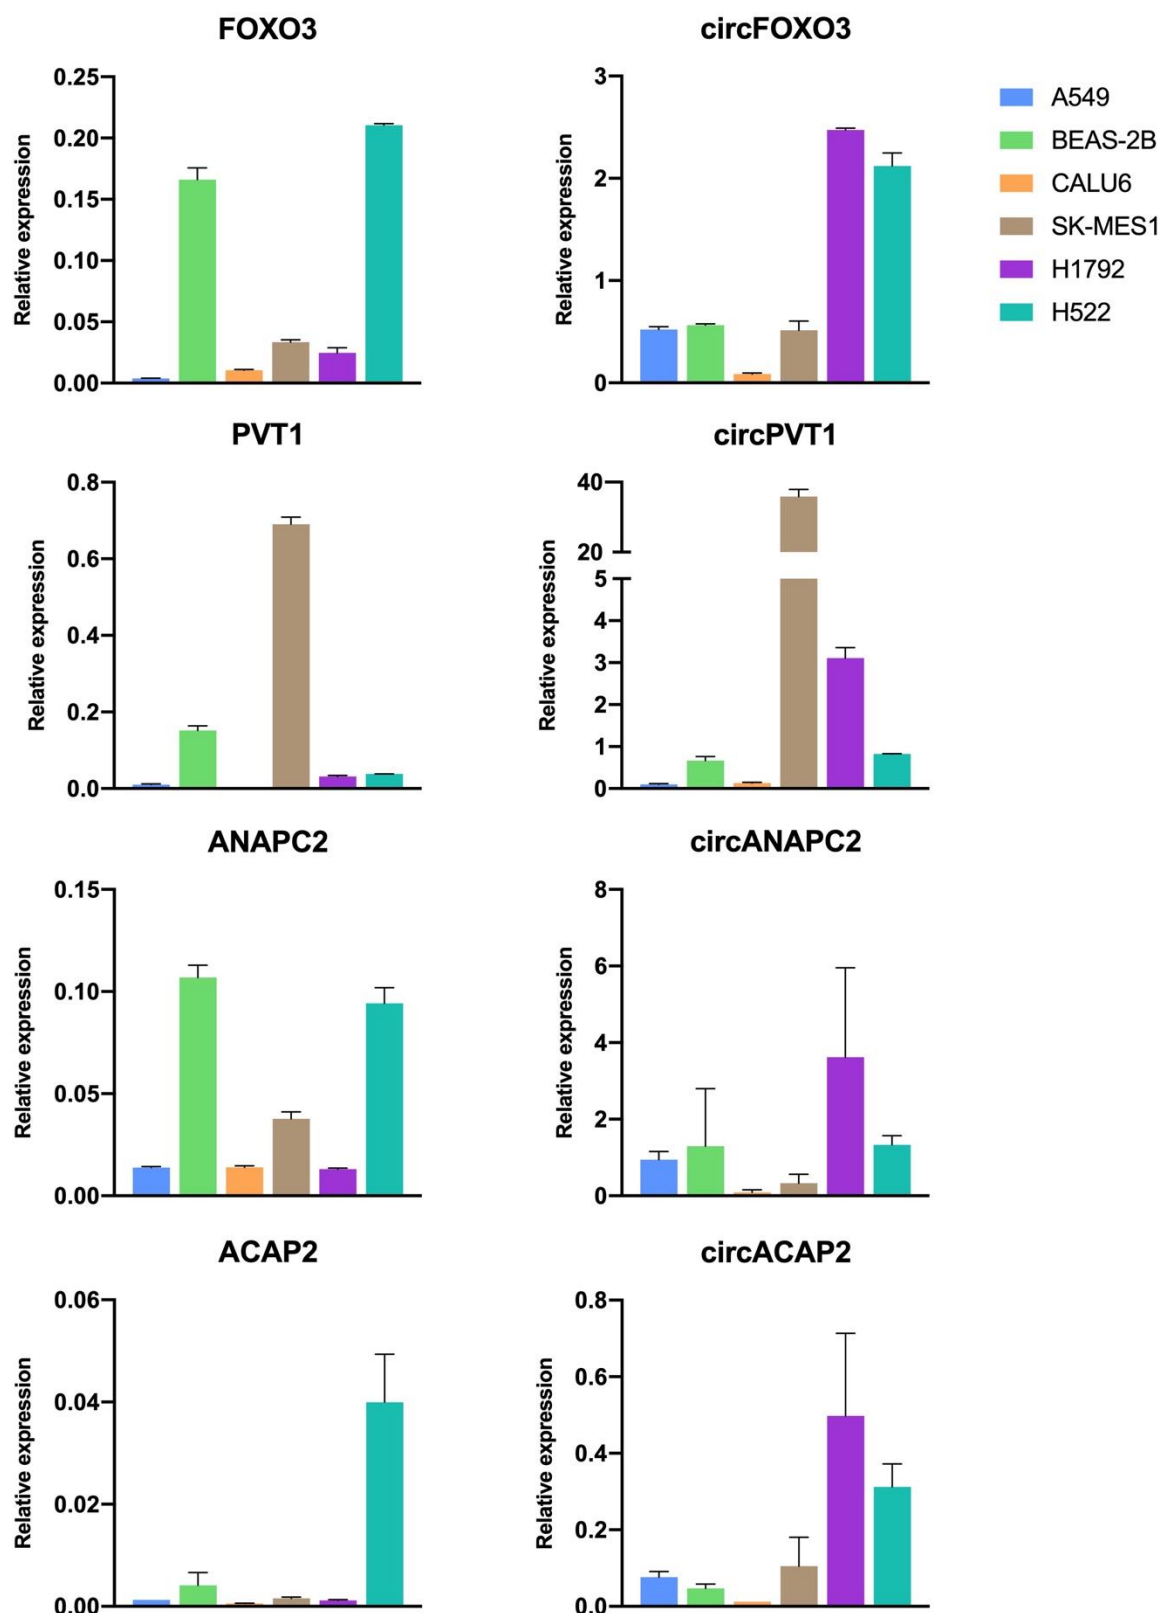

**Supplemental Figure 4.** Comparative relative expression levels of parental genes (left) and circRNAs (right) in the investigated cell lines.

**Supplemental Table 5** Name and characteristics of the utilized circRNA databases utilized in the study

|   | Name              | circRNA Annotation   | Primer Design Tool | miRNA Binding | RBP Binding | ORF Information | Reference | Comments                                                                                                                                                         |
|---|-------------------|----------------------|--------------------|---------------|-------------|-----------------|-----------|------------------------------------------------------------------------------------------------------------------------------------------------------------------|
| 1 | circBank          | ×                    | -                  | ×             | -           | ×               | 33        | Offers information about circRNA conservation and m6a modifications                                                                                              |
| 2 | circBase          | ×                    | -                  | -             | -           | -               | 32        | Extensive; Includes main curated circRNA datasets available; Provides scripts to identify circRNA in sequencing data                                             |
| 3 | circInteractome   | circBase annotation  | ×                  | ×             | ×           | -               | 44        | Extensive tool-wise; Includes both divergent primer and siRNA design tools                                                                                       |
| 4 | EncoRI (starbase) | circBase annotations | -                  | ×             | ×           | -               | 41        | Database focused on miRNA and lncRNA interactions; circRNA-miRNA interactions based on AGO CLIP-seq Data                                                         |
| 5 | Circ2GO           | Genomic coordinates  | -                  | ×             | -           | -               | 43        | Contains RNAseq data from 60 human lung cell lines and 50 lung adenocarcinoma (LUAD) cell lines. ; Transcript map and expression level heatmaps generating tools |
| 6 | CSCD              | Genomic coordinates  | -                  | ×             | ×           | ×               | 42        | Detailed information about circRNA structure, cellular localization, and alternative splicing influence on circRNA composition.                                  |

“×” - yes; “-” - no;
